# Supplementary material for: Superhydrophilic covalent organic frameworks accelerate photocatalytic production of hydrogen peroxide through proton channels
Source: Royal Society of Chemistry journal article supplement (doi:10.1039/d4ta01785d), 2024-01-01
Supplement: d4ta01785d1.pdf [file d4ta01785d1.pdf]

**Superhydrophilic covalent organic frameworks accelerate photocatalytic  
production of hydrogen peroxide through proton channels**

Xiaojuan Bai\*<sup>a,b</sup>, Linlong Guo<sup>b</sup>, Tianqi Jia<sup>b</sup>, Zhuofeng Hu\*<sup>c</sup>

<sup>a</sup>Key Laboratory of Urban Stormwater System and Water Environment, Ministry of Education, Beijing University of Civil Engineering and Architecture, Beijing 100044, China

<sup>b</sup>Beijing Energy Conservation & Sustainable Urban and Rural Development Provincial and Ministry Co-construction Collaboration Innovation Center, Beijing University of Civil Engineering and Architecture, Beijing, China

<sup>c</sup>School of Environmental Science and Engineering, Guangdong Provincial Key Laboratory of Environmental Pollution Control and Remediation Technology, Sun Yat-sen University, Guangzhou, China

**E-mail:** baixiaojuan@bucea.edu.cn, heixia.1986@163.com

huzhf8@mail.sysu.edu.cn

## S1. Experimental procedures

**Chemicals and materials.** Melamine, potassium iodide, potassium hydrogen phthalate, p-benzoquinone, disodium EDTA, tert-butanol, anhydrous ethanol, and hydrogen peroxide were purchased from Sinopharm Chemical Reagent Co, Ltd. 2,4,6-tris(4-aminophenyl)-1,3,5-triazine (TAPT), 1,4-Phthalaldehyde, terephthalaldehyde (PDA), tetrakis(4-aminophenyl)methane (TAPM), acetic acid, 1,3,5-trimethylbenzene, methanol, acetonitrile, dichloromethane and 1,2-dichlorobenzene were purchased from Shanghai Macklin Biochemical Co., Ltd. 2,5-dihydroxyterephthalaldehyde (DHA), ciprofloxacin, sulfamethoxazole, pyruvic acid, butanol and N-hexane were purchased from Aladdin Chemical Reagent Co. Ltd. All reagents purchased are analytical grade or above and can be used without further purification.

**Synthesis of Melem:** Melem was synthesized based on previous literature with slight modifications to the previous method. The melamine powder was placed in a covered crucible, after which the crucible was placed in a muffle furnace. The temperature of the muffle furnace was increased from 25 °C to 350 °C at a ramp rate of 10 °C min<sup>-1</sup> and the muffle was kept at 350 °C and held for 2 h. After the temperature of the muffle furnace was cooled down to room temperature, the crucible was removed and the white product was obtained.

**Synthesis of Melem-PDA:** A certain amount of Melem (13.1 mg) and 1,4-Phthalaldehyde (PDA) (12.1 mg) were taken into a 25 mL glass beaker. Then 4 mL of 1,3,5-trimethylbenzene and 8 mL of aqueous 6 M acetic acid were added and sonicated for 20 min for uniform dispersion. The mixed solution was transferred to a polytetrafluoroethylene liner, and a series of COFs were obtained after microwave irradiation at 100 °C, 120 °C, and 150 °C for 1 h and 2 h, respectively. After cooling to room temperature, the solids were washed with a large amount of dichloromethane

(3 × 30 mL) and methanol (3 × 30 mL) in turn. Finally, the sample COF–TAPT/PDA was dried in a vacuum oven at 100 °C for 8 h to obtain the sample Melem–PDA.

**Synthesis of TAPT–PDA:** A certain amount of TAPT (21.3 mg) and PDA (12.1 mg) were taken into a 25 mL glass beaker. Then 4 mL of 1,3,5–trimethylbenzene and 8 mL of aqueous 6 M acetic acid were added and sonicated for 20 min for uniform dispersion. The mixed solution was transferred to a polytetrafluoroethylene liner, and a series of COFs were obtained after microwave irradiation at 100 °C, 120 °C, and 150 °C for 1 h and 2 h, respectively. After cooling to room temperature, the solids were washed with a large amount of dichloromethane (3 × 30 mL) and methanol (3 × 30 mL) in turn. Finally, the sample TAPT–PDA was dried in a vacuum oven at 100 °C for 8 h to obtain the sample TAPT–PDA.

**Synthesis of TAPM–PDA:** A certain amount of TAPM (22.8 mg) and PDA (12.1 mg) were taken into a 25 mL glass beaker. Then 4 mL of 1,3,5–trimethylbenzene and 8 mL of aqueous 6 M acetic acid were added and sonicated for 20 min for uniform dispersion. The mixed solution was transferred to a polytetrafluoroethylene liner, and a series of COFs were obtained after microwave irradiation at 100 °C, 120 °C, and 150 °C for 1 h and 2 h, respectively. After cooling to room temperature, the solids were washed with a large amount of dichloromethane (3 × 30 mL) and methanol (3 × 30 mL) in turn. Finally, the COF–TAPM/PDA was dried in a vacuum oven at 100 °C for 8 h to obtain TAPM–PDA.

**Synthesis of Melem–DHA:** An amount of Melem (13.1 mg) and DHA (15.0 mg) was taken into a 25 mL glass beaker. Then 4 mL of 1,3,5–trimethylbenzene and 8 mL of aqueous 6 M acetic acid were added and sonicated for 20 min for uniform dispersion. The mixed solution was transferred to a polytetrafluoroethylene liner, and a series of COFs were obtained after microwave irradiation at 100 °C, 120 °C, and 150 °C for 1 h and 2 h, respectively. After cooling to room temperature, the solids were washed with a large amount of dichloromethane (3 × 30 mL) and methanol (3 × 30 mL) in turn.

Finally, the sample Melem–DHA was dried in a vacuum oven at 100 °C for 8 h to obtain the sample Melem–DHA.

**Synthesis of TAPT–DHA:** A certain amount of TAPT (13.1 mg) and DHA (15.0 mg) were taken into a 25 mL glass beaker. Then 4 mL of 1,3,5–trimethylbenzene and 8 mL of aqueous 6 M acetic acid were added and sonicated for 20 min for uniform dispersion. The mixed solution was transferred to a polytetrafluoroethylene liner, and a series of COFs were obtained after microwave irradiation at 100 °C, 120 °C, and 150 °C for 1 h and 2 h, respectively. After cooling to room temperature, the solids were washed with a large amount of dichloromethane (3 × 30 mL) and methanol (3 × 30 mL) in turn. Finally, the samples were dried in a vacuum oven at 100 °C for 8 h to obtain the sample TAPT–DHA.

**Synthesis of TAPM–DHA:** A certain amount of TAPM (22.8 mg) and DHA (15.0 mg) were taken into a 25 mL glass beaker. Then 4 mL of 1,3,5–trimethylbenzene and 8 mL of aqueous 6 M acetic acid were added and sonicated for 20 min for uniform dispersion. The mixed solution was transferred to a polytetrafluoroethylene liner, and a series of COFs were obtained after microwave irradiation at 100 °C, 120 °C, and 150 °C for 1 h and 2 h, respectively. After cooling to room temperature, the solids were washed with a large amount of dichloromethane (3 × 30 mL) and methanol (3 × 30 mL) in turn. Finally, the samples were dried in a vacuum oven at 100 °C for 8 h to obtain the sample TAPM–DHA.

## S2. Supporting Figures and Tables

Different COFs material precursors (Melem, TAPT, TAPM, PDA, DHA) were selected for microwave synthesis under different conditions (temperature for 100 °C, 120 °C, 150 °C, time for 1 h, 2 h), and the synthesized routes are shown in **Figure S1** below, and a total of 36 samples were synthesized from A1 labeling to F6, respectively, with the specific precursors and conditions as shown in **Table S1** and the photocatalytic production of H<sub>2</sub>O<sub>2</sub> was tested after the synthesis of COFs materials. As can be seen from **Figure S2** and **Figure S3**, the H<sub>2</sub>O<sub>2</sub> yields of the synthesized samples under microwave treatment at 120 °C for 1 h were higher, and the TAPT–DHA series of samples had the best performance, with the highest photocatalytic H<sub>2</sub>O<sub>2</sub> yield of up to 1629  $\mu\text{mol}\cdot\text{h}^{-1}\cdot\text{g}^{-1}$  for the highest D3 sample (TAPT–DHA).

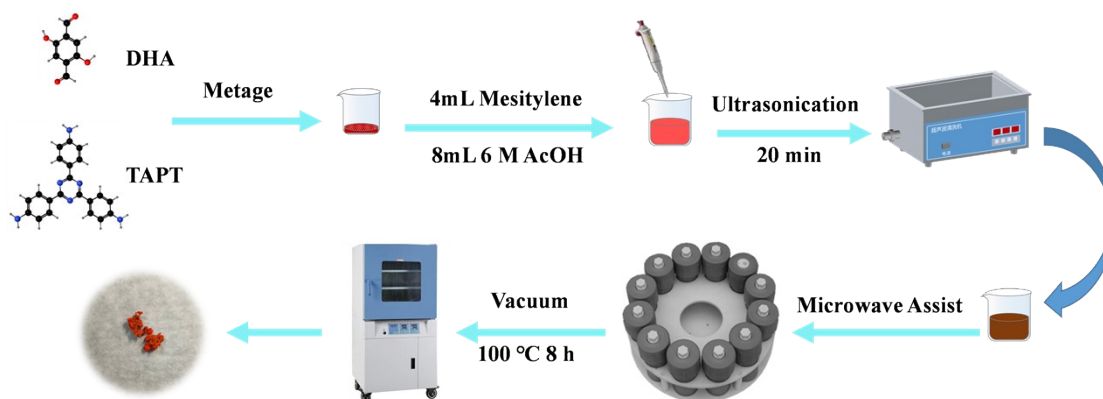

**Figure S1.** Sample synthesis process.

**Table S1.** Synthesis of samples.

| Samples |        | Melem |     | TAPT |     | TAPM |     |
|---------|--------|-------|-----|------|-----|------|-----|
|         |        | 1 h   | 2 h | 1 h  | 2 h | 1 h  | 2 h |
| PDA     | 100 °C | A1    | A2  | C1   | C2  | E1   | E2  |
|         | 120 °C | A3    | A4  | C3   | C4  | E3   | E4  |
|         | 150 °C | A5    | A6  | C5   | C6  | E5   | E6  |
| DHA     | 100 °C | B1    | B2  | D1   | D2  | F1   | F2  |
|         | 120 °C | B3    | B4  | D3   | D4  | F3   | F4  |
|         | 150 °C | B5    | B6  | D5   | D6  | F5   | F6  |

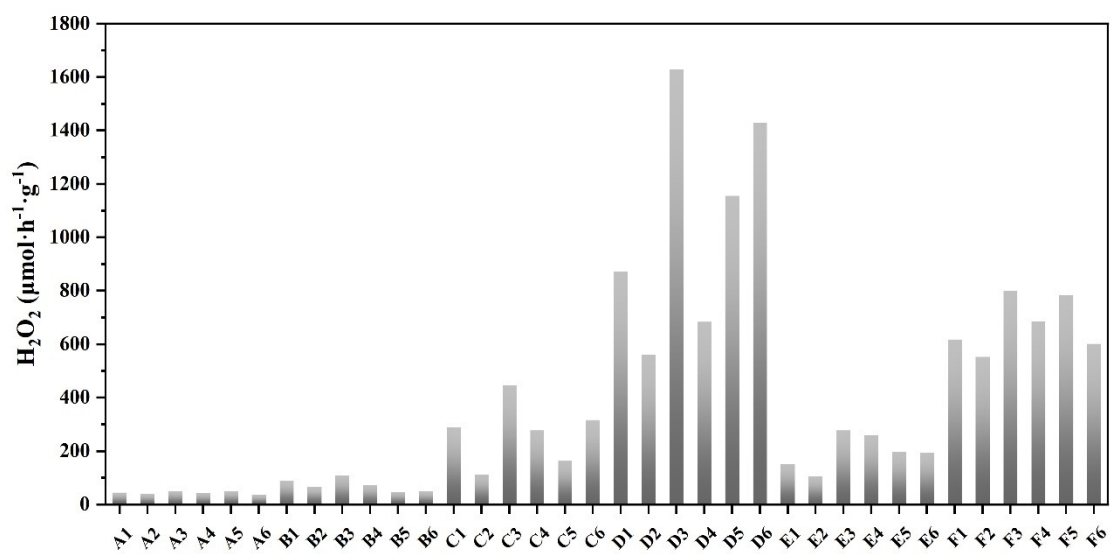

**Figure S2.** Comparison of photocatalytic H<sub>2</sub>O<sub>2</sub> production performance of COFs samples.

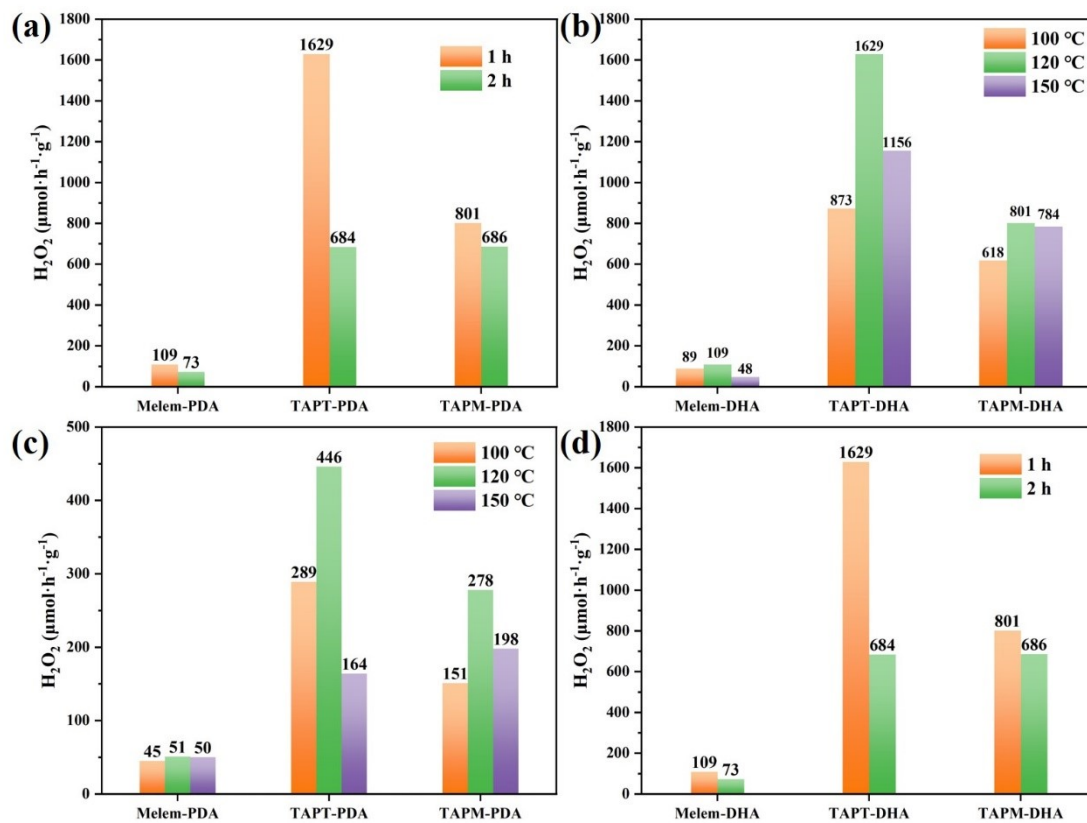

**Figure S3.** Comparison of  $\text{H}_2\text{O}_2$  production performance of COFs under different synthesis conditions.

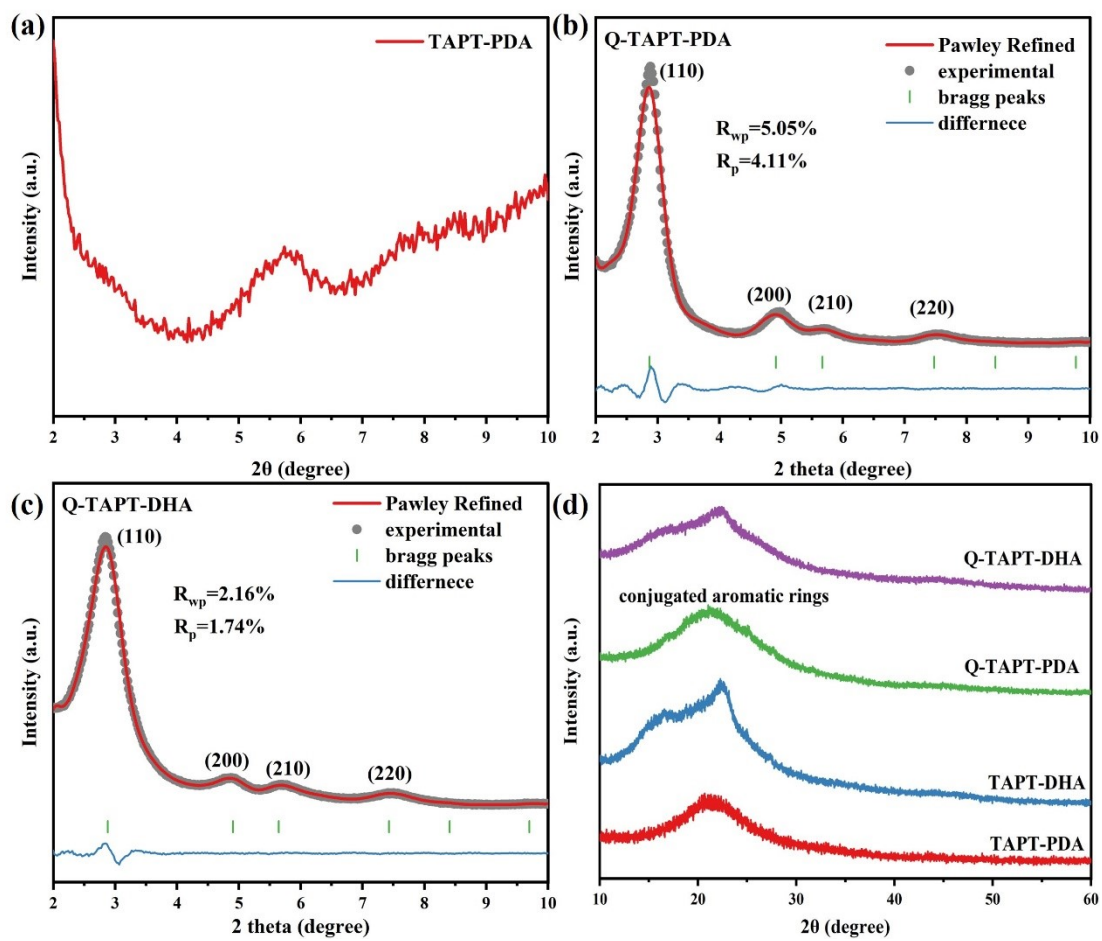

Figure S4. XRD patterns of TAPT-PDA, Q-TAPT-PDA and Q-TAPT-DHA.



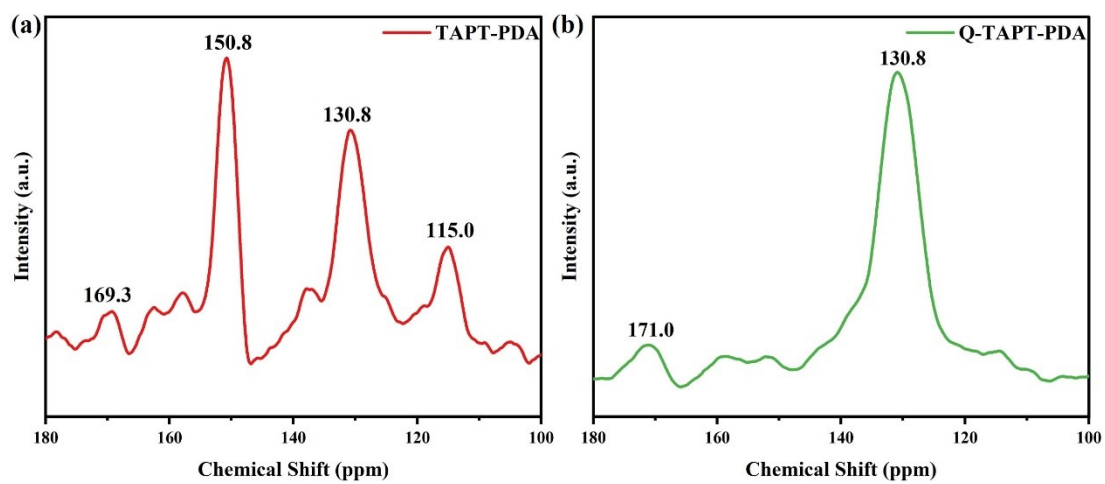

**Figure S5.** Solid-state  $^{13}\text{C}$  CP-MAS NMR spectra of TAPT-PDA and Q-TAPT-PDA.

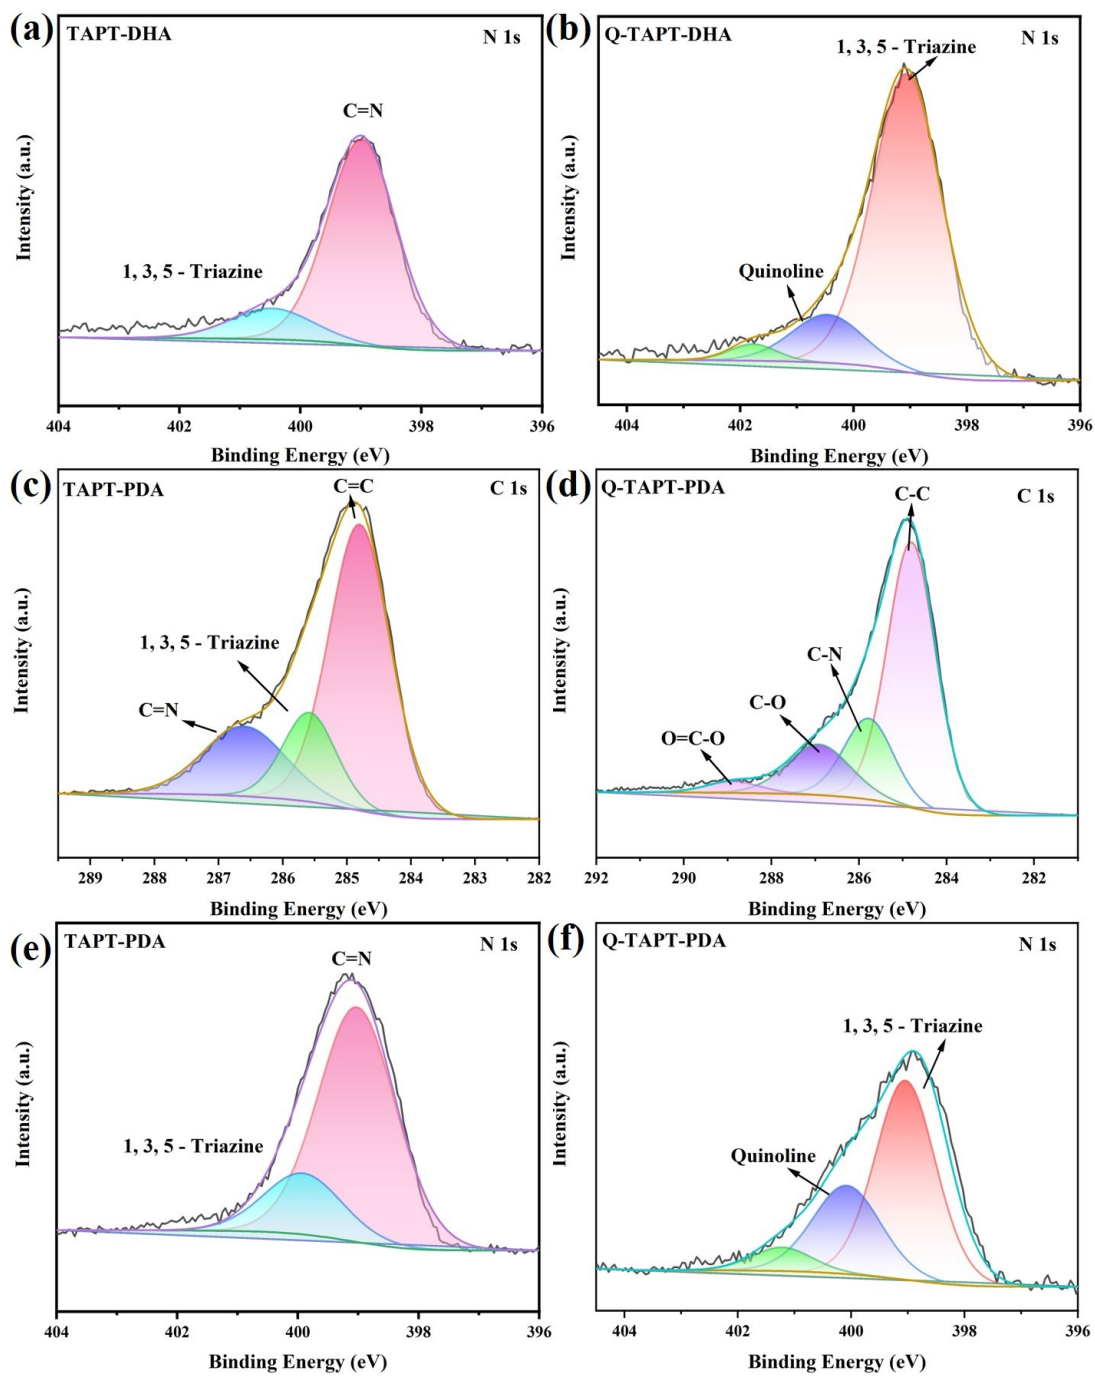

**Figure S6.** N 1s spectrum of (a) TAPT-DHA, (b) Q-TAPT-DHA, (d) TAPT-PDA and (e) Q-TAPT-PDA. C 1s spectrum of (c) TAPT-PDA and (d) Q-TAPT-PDA.

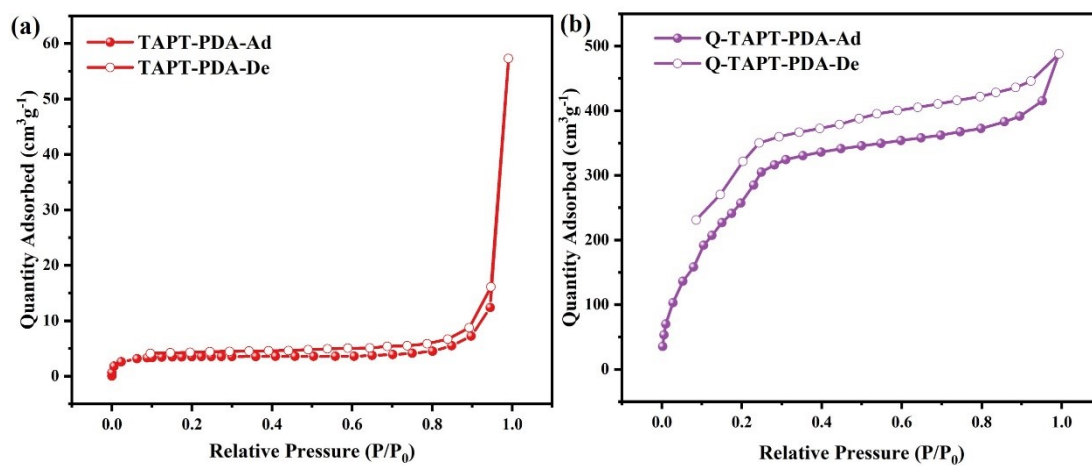

**Figure S7.**  $N_2$  adsorption and desorption curves of TAPT-PDA and Q-TAPT-PDA.

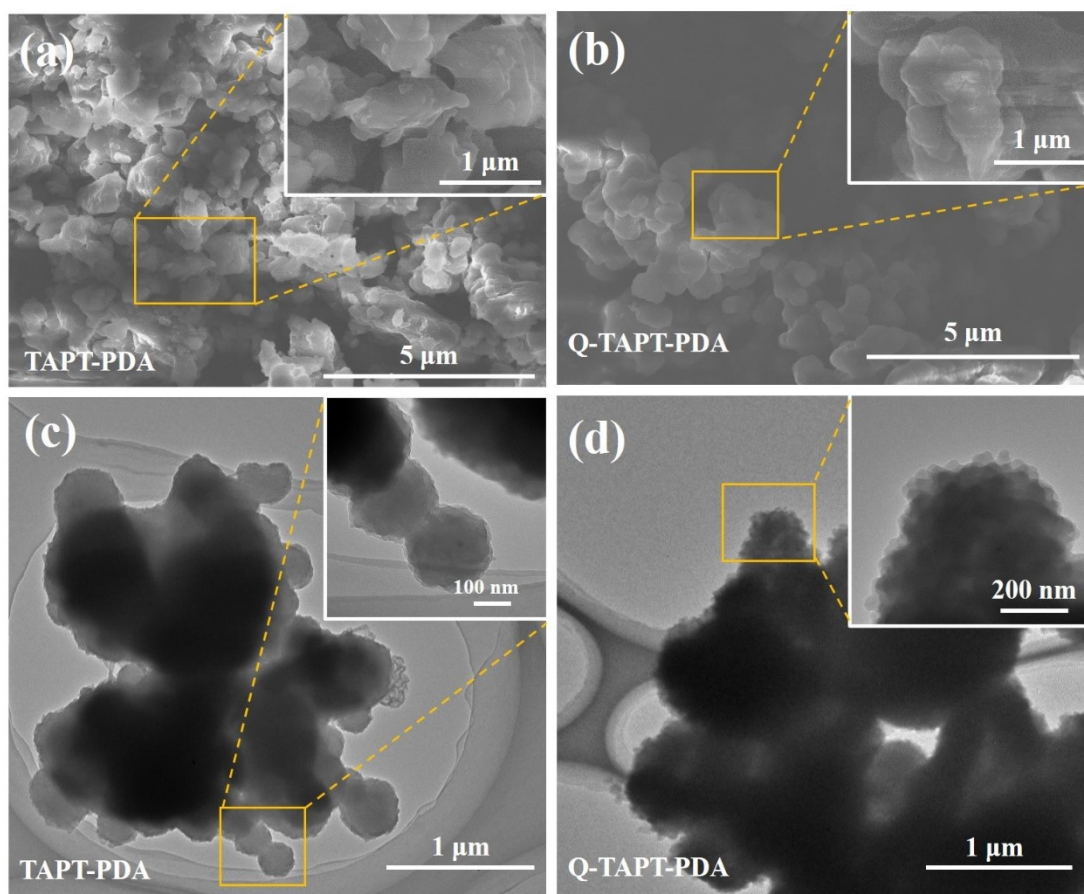

**Figure S8.** SEM image of (a) TAPT-PDA and (b) Q-TAPT-PDA at a scale of 5  $\mu\text{m}$ .  
TEM image of (c) TAPT-PDA and (d) Q-TAPT-PDA at a scale of 1  $\mu\text{m}$ .

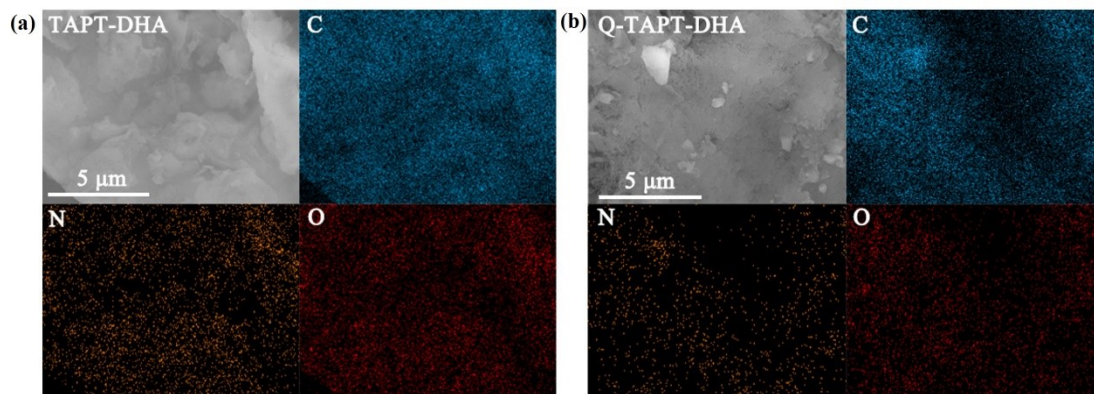

**Figure S9.** EDX mapping images of C, N and O elements in TAPT-DHA and Q-TAPT-DHA.

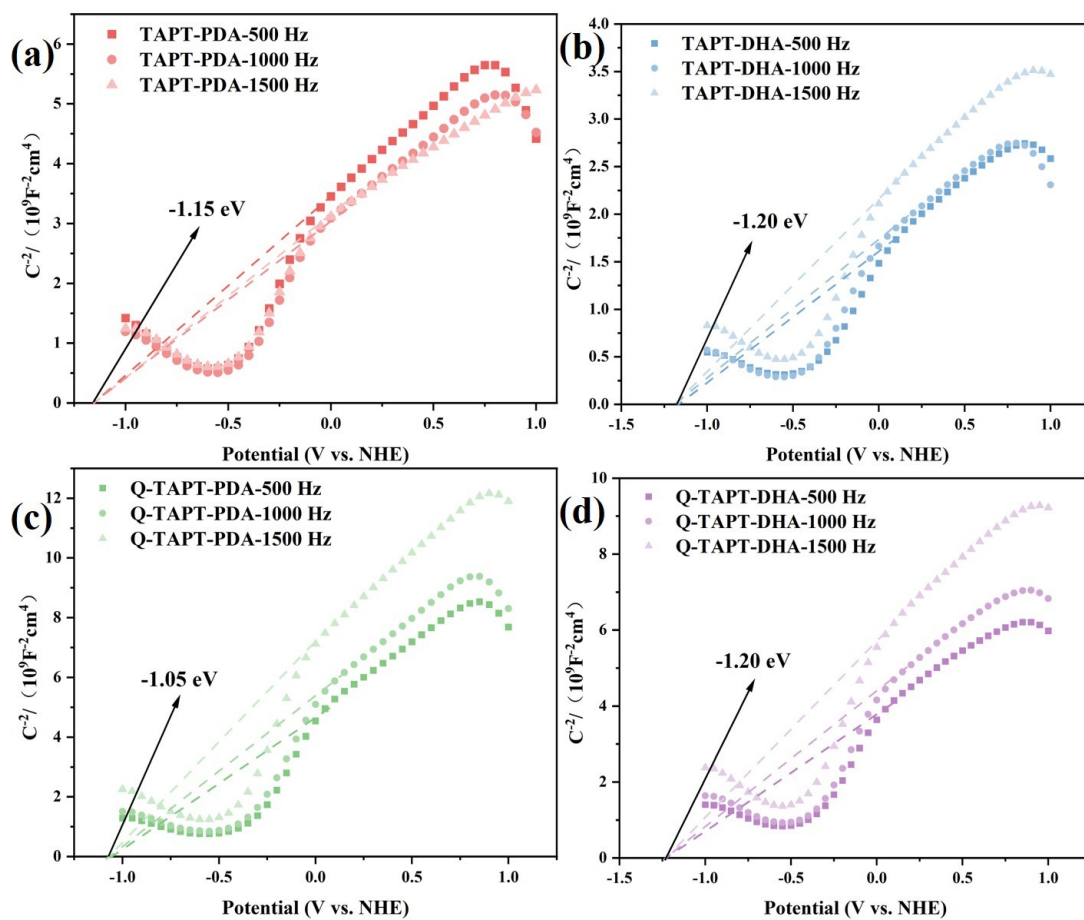

**Figure S10.** Mott-Schottky plots of (a) TAPT-PDA, (b) TAPT-DHA, (c) Q-TAPT-PDA and (d) Q-TAPT-DHA at frequencies of 0.5, 1.0, and 1.5 kHz.

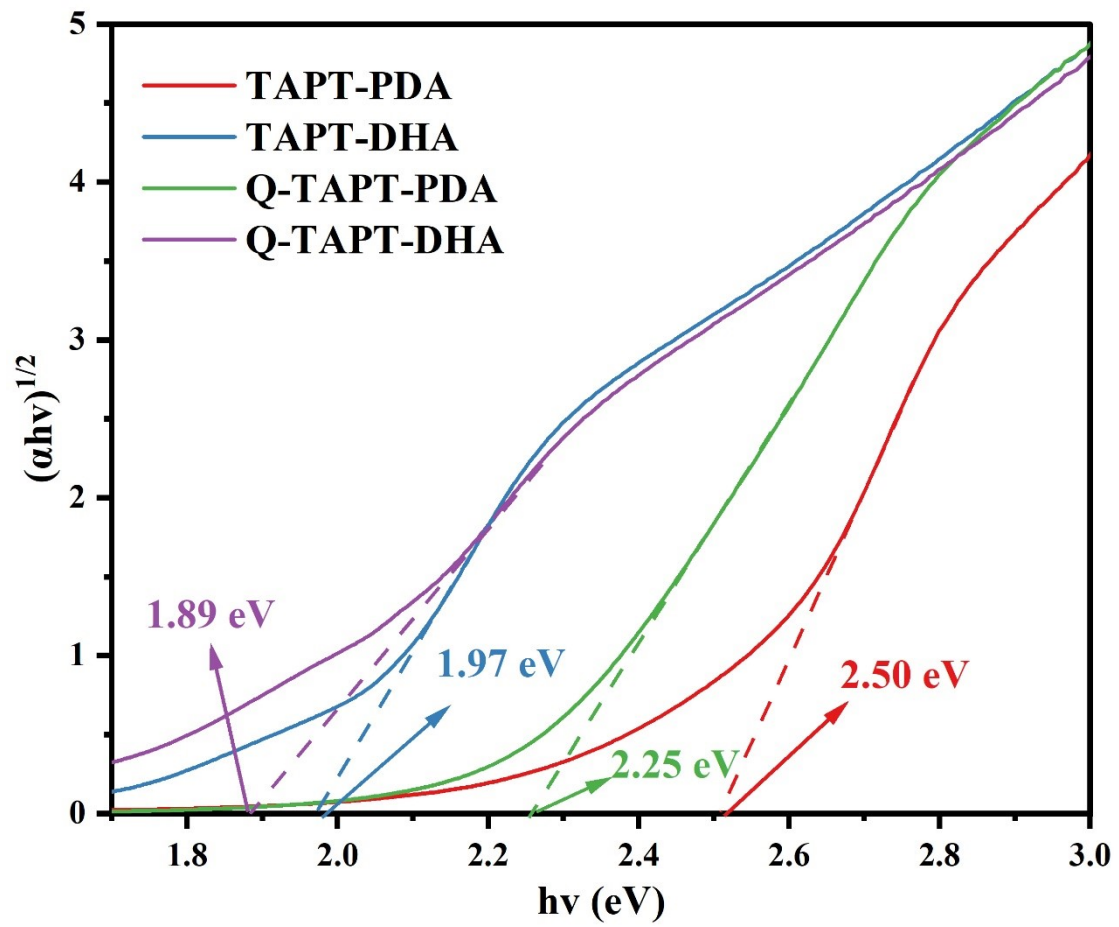

**Figure S11.** The energy gap of TAPT-PDA, TAPT-DHA, Q-TAPT-PDA and Q-TAPT-DHA that were estimated by the Tauc plot.

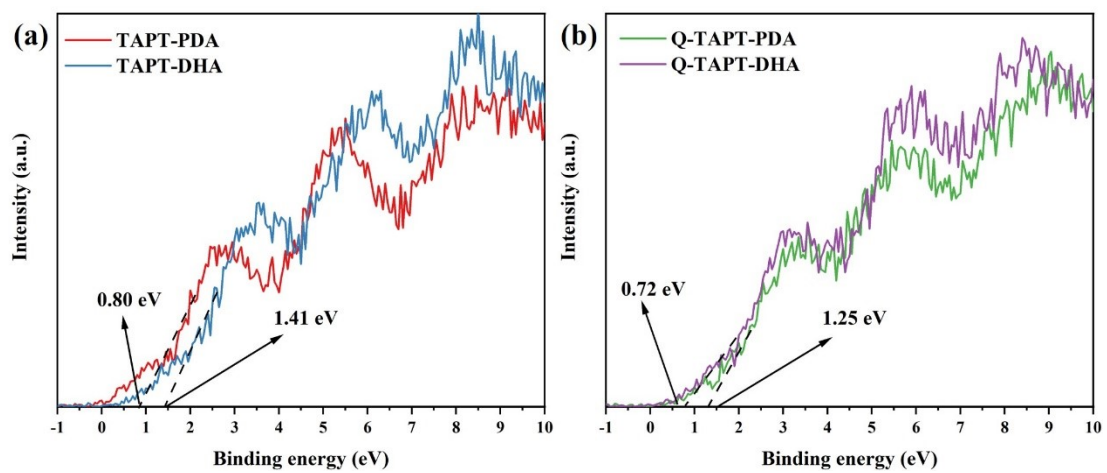

**Figure S12.** XPS VB spectrum of (a) TAPT-PDA, TAPT-DHA, (b) Q-TAPT-PDA and Q-TAPT-DHA.



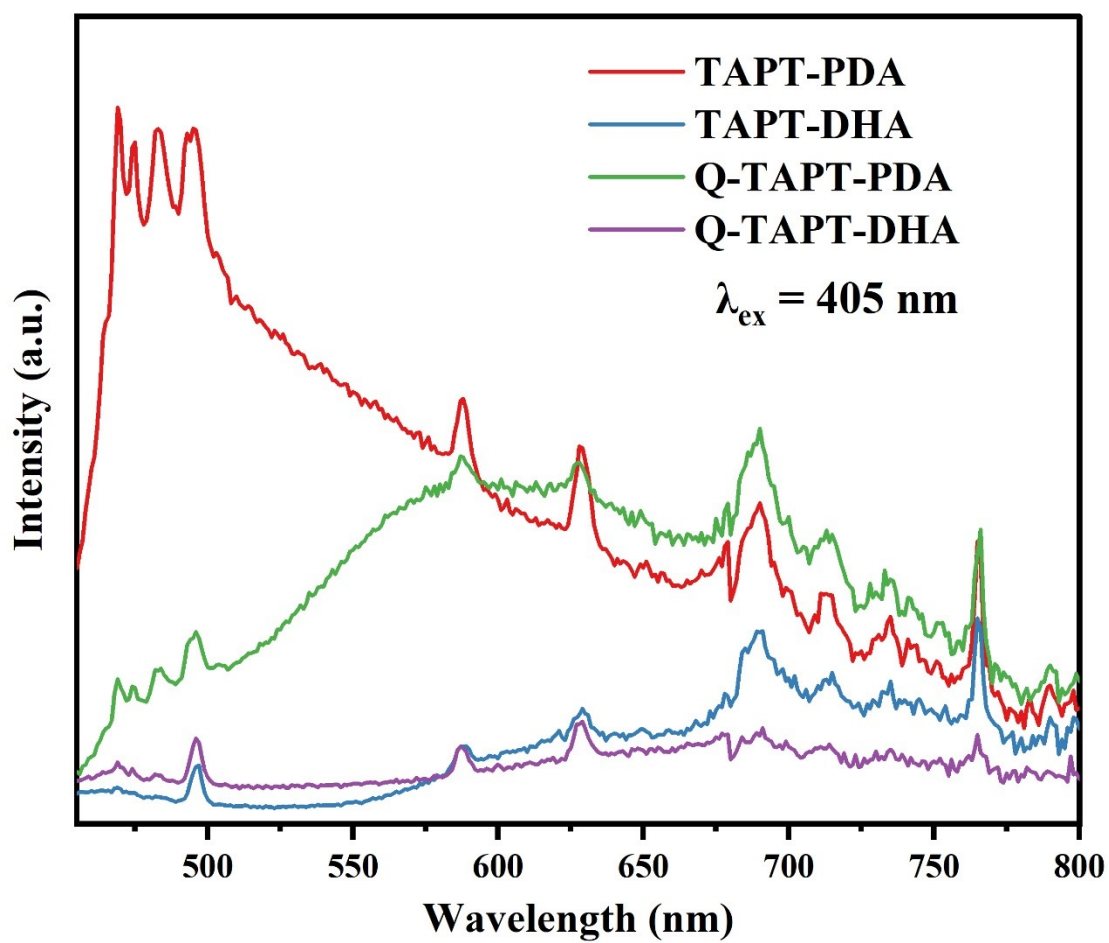

**Figure S13.** PL spectra of TAPT-PDA, TAPT-DHA, Q-TAPT-PDA and Q-TAPT-DHA, with the excitation wavelength of 405 nm.

Table S2 Comparison of recent photocatalytic performance of H<sub>2</sub>O<sub>2</sub> produced by other COFs materials

| Samples                    | Solution              | Atmosphere     | Light source | H <sub>2</sub> O <sub>2</sub> generation rate (μmol·g <sup>-1</sup> ·h <sup>-1</sup> ) | AQY (%) (@420 nm)                  | Ref.             |
|----------------------------|-----------------------|----------------|--------------|----------------------------------------------------------------------------------------|------------------------------------|------------------|
| TAPD-(Me) <sub>2</sub> COF | 10% EtOH              | O <sub>2</sub> | 420–700 nm   | 97                                                                                     | /                                  | [1]              |
| sonoCOF-F2                 | H <sub>2</sub> O      | Air            | AM 1.5       | 1244.44                                                                                | 4.8%                               | [2]              |
| COF-TTA-TTTA               | H <sub>2</sub> O      | O <sub>2</sub> | >420 nm      | 2406                                                                                   | /                                  | [3]              |
| TAPB-PDA-OH                | 10% EtOH              | O <sub>2</sub> | >420 nm      | 2117.6                                                                                 | 2.99%                              | [4]              |
| COF-TfpBpy                 | H <sub>2</sub> O      | Air            | 420–700 nm   | 694.7                                                                                  | 8.1%                               | [5]              |
| CoPc-BTM-COF               | 10% EtOH              | O <sub>2</sub> | >400 nm      | 2096                                                                                   | 7.2% at 630 nm<br>0.063% at 450 nm | [6]              |
| DETH-COF                   | H <sub>2</sub> O      | Air            | ≥420 nm      | 1665                                                                                   | at 450 nm                          | [7]              |
| 4PE-N-S COF                | H <sub>2</sub> O      | O <sub>2</sub> | 420–700 nm   | 1574                                                                                   | /                                  | [8]              |
| DMCR-1NH                   | H <sub>2</sub> O      | Air            | >420 nm      | 2264.5                                                                                 | 10.2%                              | [9]              |
| PyDa-COF                   | 50% BA                | O <sub>2</sub> | 420–700 nm   | 1223.3                                                                                 | 4.5%                               | [10]             |
| 1H-COF                     | 10% IPA               | O <sub>2</sub> | >420 nm      | 1483.3                                                                                 | 5.4%                               | [11]             |
| TpAQ-COF-12                | H <sub>2</sub> O      | O <sub>2</sub> | >420 nm      | 420                                                                                    | 7.4%                               | [12]             |
| Bpy-TAPT                   | H <sub>2</sub> O      | O <sub>2</sub> | >420 nm      | 4038                                                                                   | 8.6%                               | [13]             |
| CHF-DPDA                   | H <sub>2</sub> O      | O <sub>2</sub> | >420 nm      | 1725                                                                                   | 16%                                | [14]             |
| HEP-TAPT-COF               | H <sub>2</sub> O      | O <sub>2</sub> | >420 nm      | 1750                                                                                   | 15.35%                             | [15]             |
| TiCOF-spn                  | 90% EtOH              | O <sub>2</sub> | 420–780 nm   | 489.94                                                                                 | /                                  | [16]             |
| COF-NUST-16                | 10% EtOH              | O <sub>2</sub> | >420 nm      | 1081                                                                                   | 5.1% at 400 nm<br>13.12% at 365 nm | [17]             |
| ZnO/COF                    | 10% EtOH              | O <sub>2</sub> | AM1.5        | 2443                                                                                   | at 365 nm                          | [18]             |
| TiO <sub>2</sub> /BTTA     | Furfuyl alcohol       | O <sub>2</sub> | 350–780 nm   | 740                                                                                    | /                                  | [19]             |
| <b>TAPT-DHA</b>            | <b>H<sub>2</sub>O</b> | <b>Air</b>     | <b>AM1.5</b> | <b>1629</b>                                                                            | <b>6.52%<br/>7.79% at</b>          | <b>This work</b> |

|                   |                       |            |              |             |          |                      |  |
|-------------------|-----------------------|------------|--------------|-------------|----------|----------------------|--|
|                   |                       |            |              |             |          | <b>450 nm</b>        |  |
| <b>Q-TAPT-DHA</b> | <b>H<sub>2</sub>O</b> | <b>Air</b> | <b>AM1.5</b> | <b>1547</b> | <b>/</b> | <b>This<br/>work</b> |  |

---

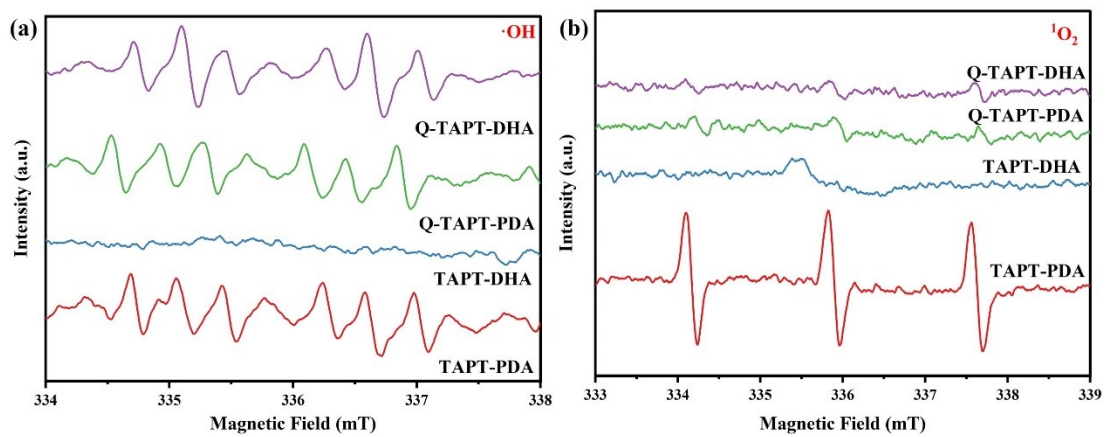

**Figure S14.** ESR spectra of  $\cdot\text{OH}$  and  $^1\text{O}_2$  of TAPT-PDA, TAPT-DHA, Q-TAPT-PDA and Q-TAPT-DHA.

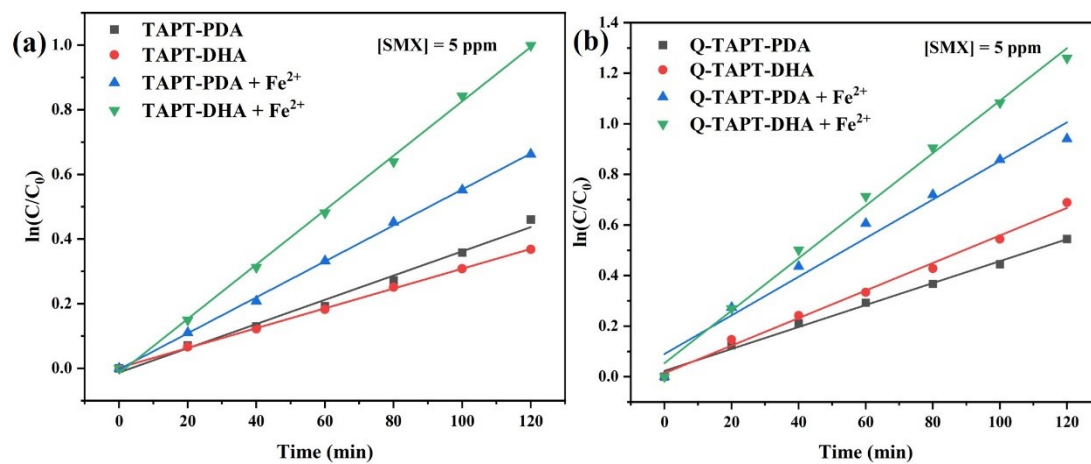

**Figure S15.** The first order kinetic constants of SMX degradation.

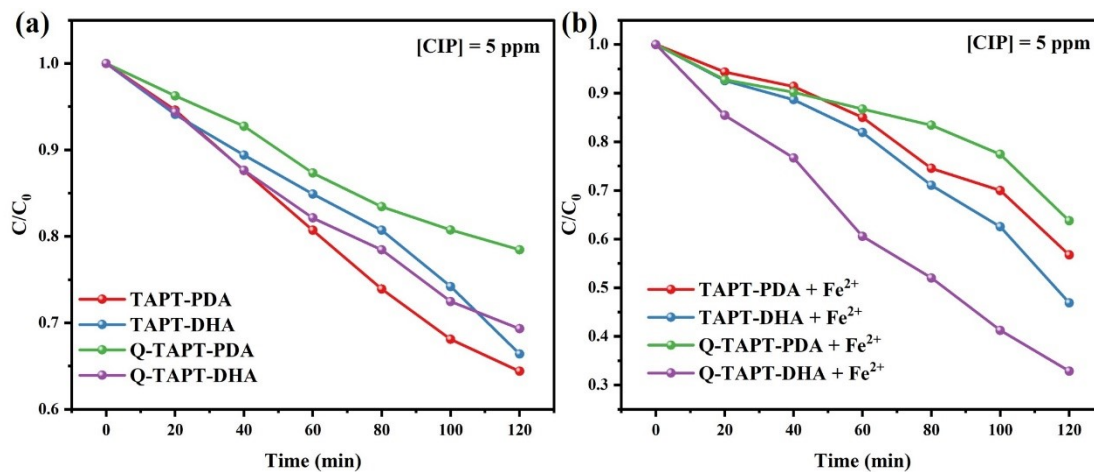

**Figure S16.** (a) Photocatalytic degradation of CIP by TAPT-PDA, TAPT-DHA, Q-TAPT-PDA and Q-TAPT-DHA. (b) Photocatalytic self-Fenton degradation of CIP by TAPT-PDA, TAPT-DHA, Q-TAPT-PDA and Q-TAPT-DHA.

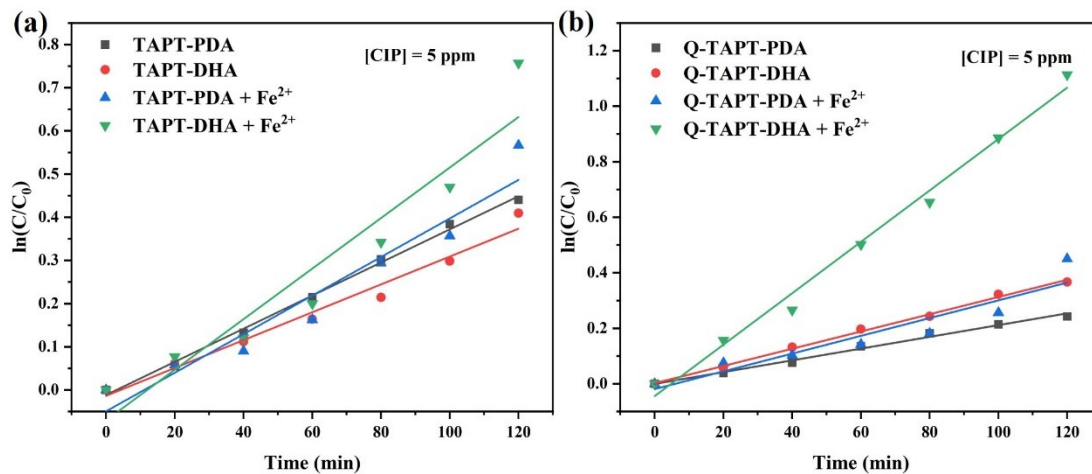

**Figure S17.** The first order kinetic constants of CIP degradation.

## References

- [1] C. Krishnaraj, H. Sekhar Jena, L. Bourda, A. Laemont, P. Pachfule, J. r. m. Roeser, C. V. Chandran, S. Borgmans, S. M. Rogge, K. Leus, *J. Am. Chem. Soc.* **2020**, *142*, 20107-20116.
- [2] W. Zhao, P. Yan, B. Li, M. Bahri, L. Liu, X. Zhou, R. Clowes, N. D. Browning, Y. Wu, J. W. Ward, *J. Am. Chem. Soc.* **2022**, *144*, 9902-9909.
- [3] F. Tan, Y. Zheng, Z. Zhou, H. Wang, X. Dong, J. Yang, Z. Ou, H. Qi, W. Liu, Z. Zheng, *CCS Chemistry* **2022**, *4*, 3751-3761.
- [4] Y. Yang, J. Kang, Y. Li, J. Liang, J. Liang, L. Jiang, D. Chen, J. He, Y. Chen, J. Wang, *New. J. Chem.* **2022**, *46*, 21605-21614.
- [5] M. Kou, Y. Wang, Y. Xu, L. Ye, Y. Huang, B. Jia, H. Li, J. Ren, Y. Deng, J. Chen, *Angew. Chem. Int. Ed.* **2022**, *61*, e202200413.
- [6] Q. Zhi, W. Liu, R. Jiang, X. Zhan, Y. Jin, X. Chen, X. Yang, K. Wang, W. Cao, D. Qi, *J. Am. Chem. Soc.* **2022**, *144*, 21328-21336.
- [7] G. Pan, X. Hou, Z. Liu, C. Yang, J. Long, G. Huang, J. Bi, Y. Yu, L. Li, *ACS Catal.* **2022**, *12*, 14911-14917.
- [8] M. Deng, J. Sun, A. Laemont, C. Liu, L. Wang, L. Bourda, J. Chakraborty, K. Van Hecke, R. Morent, N. De Geyter, *Green. Chem.* **2023**, *25*, 3069-3076.
- [9] P. Das, G. Chakraborty, J. Roeser, S. Vogl, J. Rabeah, A. Thomas, *J. Am. Chem. Soc.* **2023**, *145*, 2975-2984.
- [10] J. Sun, H. Sekhar Jena, C. Krishnaraj, K. Singh Rawat, S. Abednatanzi, J. Chakraborty, A. Laemont, W. Liu, H. Chen, Y. Y. Liu, *Angew. Chem. Int. Ed.* **2023**, *62*, e202216719.
- [11] H. Hu, Y. Tao, D. Wang, C. Li, Q. Jiang, Y. Shi, J. Wang, J. Qin, S. Zhou, Y. Kong, *J. Colloid. Interf. Sci.* **2023**, *629*, 750-762.
- [12] X. Zhang, J. Zhang, J. Miao, X. Wen, C. Chen, B. Zhou, M. Long, *Chem. Eng. J.* **2023**, *466*, 143085.
- [13] Y. Liu, W.-K. Han, W. Chi, Y. Mao, Y. Jiang, X. Yan, Z.-G. Gu, *Appl. Catal. B* **2023**, *331*, 122691.
- [14] H. Cheng, H. Lv, J. Cheng, L. Wang, X. Wu, H. Xu, *Adv. Mater.* **2022**, *34*,



2107480.

- [15] D. Chen, W. Chen, Y. Wu, L. Wang, X. Wu, H. Xu, L. Chen, *Angew. Chem. Int. Ed.* **2023**, *135*, e202217479.
- [16] W.-K. Han, H.-S. Lu, J.-X. Fu, X. Liu, X. Zhu, X. Yan, J. Zhang, Y. Jiang, H. Dong, Z.-G. Gu, *Chem. Eng. J.* **2022**, *449*, 137802.
- [17] M. Wu, Z. Shan, J. Wang, T. Liu, G. Zhang, *Chem. Eng. J.* **2023**, *454*, 140121.
- [18] Y. Zhang, J. Qiu, B. Zhu, M. Fedin, B. Cheng, J. Yu, L. Zhang, *Chem. Eng. J.* **2022**, *444*, 136584.
- [19] Y. Yang, J. Liu, M. Gu, B. Cheng, L. Wang, J. Yu, *Appl. Catal. B* **2023**, *333*, 122780.
